# Supplementary material for: Dynamic covalent hydrogel of natural product baicalin with antibacterial activities
Source: PubMed Central journal article supplement — RSC Adv. 2022 Mar 21;12(14):8737–42. doi: 10.1039/d1ra07553e (PMC8984956; doi:10.1039/d1ra07553e), 2022-03-21
Supplement: RA-012-D1RA07553E-s001.pdf [file RA-012-D1RA07553E-s001.pdf]

## Dynamic covalent hydrogel of natural product baicalin with antibacterial activities

Zhen-Zhen Wang,<sup>a\*</sup> Yuan Jia,<sup>a</sup> Guoqiang Wang,<sup>a</sup> Hongjuan He,<sup>a</sup> Lihua Cao,<sup>a</sup> Yanmei Shi,<sup>a</sup>  
Mingsan Miao,<sup>a\*</sup> and Xiu-Min Li<sup>b, c\*</sup>

<sup>a</sup>Academy of Chinese Medical Science, Henan University of Chinese Medicine, Zhengzhou, China

<sup>b</sup>Department of Pathology, Microbiology & Immunology, New York Medical College, Valhalla, NY,  
USA

<sup>c</sup>Department of Otolaryngology, New York Medical College, Ardsley, NY

\*Corresponding authors: zzwang@hactcm.edu.cn; XiuMin\_Li@NYMC.edu

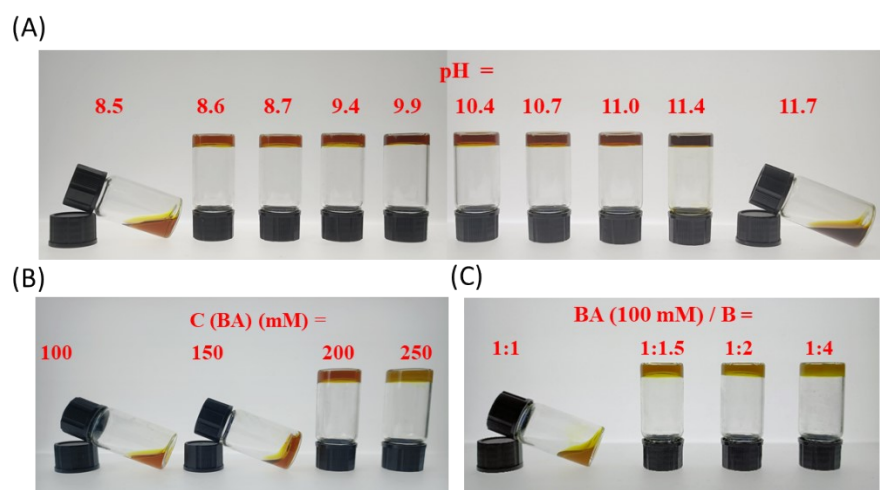

Fig. S1 The Baicalin (BA) hydrogels. (A) BA/Na<sub>2</sub>B<sub>4</sub>O<sub>7</sub> mixtures at different pH conditions. (B) BA/Na<sub>2</sub>B<sub>4</sub>O<sub>7</sub> mixtures (4:1) mixture at different concentration. (C) BA/Na<sub>2</sub>B<sub>4</sub>O<sub>7</sub> mixtures at different ratios.

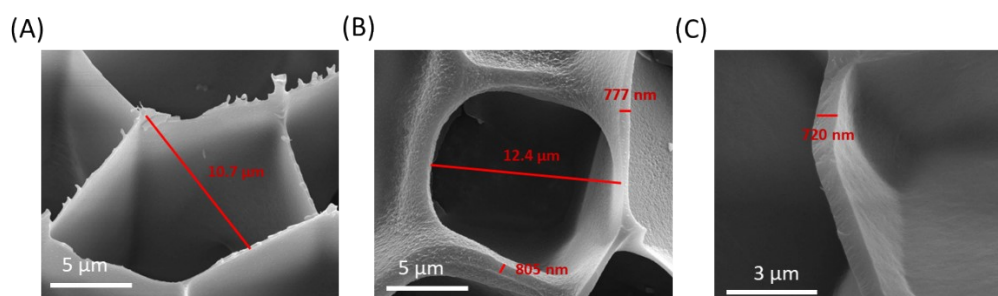

Fig. S2 The pore structure of BA hydrogel under SEM. (A) The pore with 10.7 μm diameter; (B) The pore with 12.4 μm diameter; (B) The wall with 720 nm thickness.

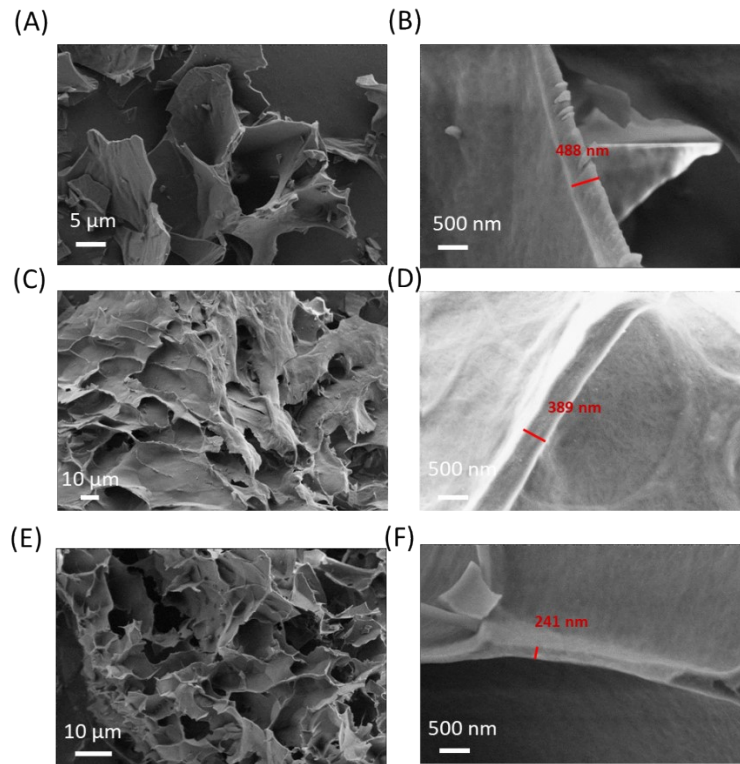

Fig. S3 The SEM images of BA hydrogel at different concentrations and BA/B ratios. (A)(B) BA:B=200 mM:200 mM; (C)(D) BA:B=200 mM:400 mM; (E)(F) BA:B=200 mM:800 mM.

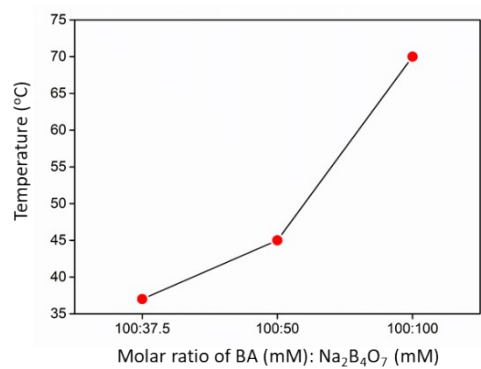

Fig. S4 The the critical gelation temperature of BA/ Na<sub>2</sub>B<sub>4</sub>O<sub>7</sub> hydrogel at different ratios.

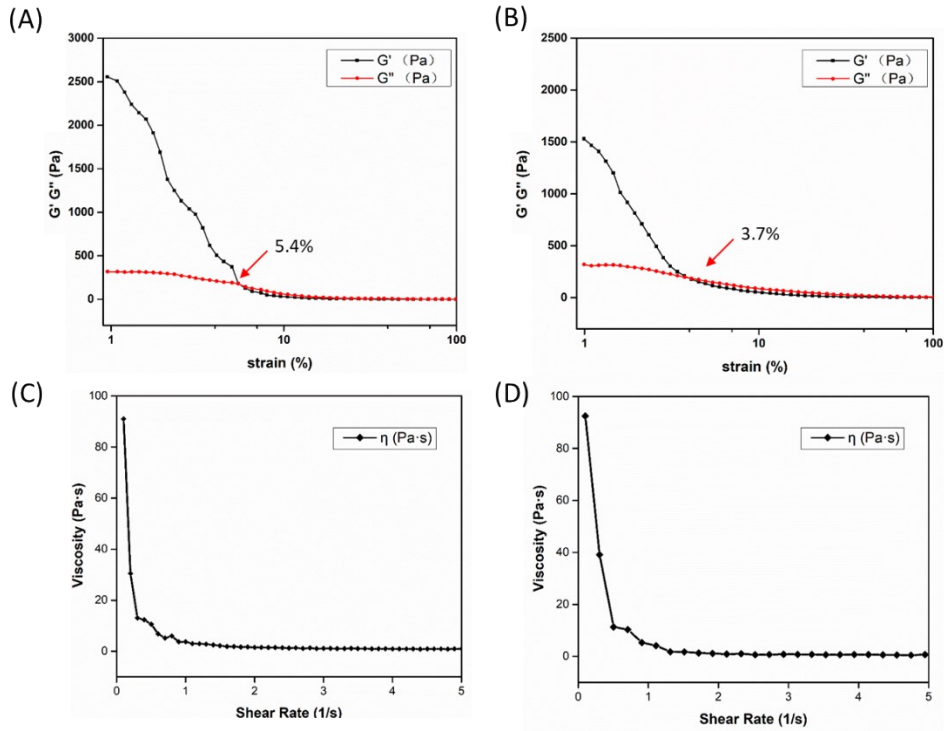

Fig. S5 Rheological tests of BA hydrogel at 30 °C and 40 °C respectively.  $G'$  and  $G''$  of hydrogel as a function of strain at a frequency of 1 Hz at 30 °C (A) and 40 °C (B); (B) Viscosity with the change of shear rate at 30 °C (C) and 40 °C (D).

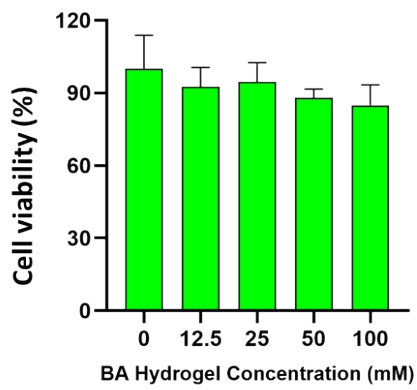

Fig. S6 Cell viability under different BA hydrogel concentration.
